# Supplementary material for: UK Hydrological Outlook using Historic Weather Analogues
Source: Copernicus journal article supplement (doi:10.5194/egusphere-2025-2369), 2025-06-03
Supplement: Supplementary file [file egusphere-2025-2369-AC2-supplement.pdf]

# UK Hydrological Outlook using Historic Weather Analogues

## Reviewer #2

Thank you for the opportunity to review this manuscript evaluating the use of Historic Weather Analogues (HWAs) for improved seasonal streamflow prediction across UK catchments. This work builds on over 25 years of research on incorporating climate information into seasonal forecasts (e.g., Hamlet and Lettenmaier, 1999), providing a systematic hindcast evaluation and nation-wide case study of the HWA method that is directly relevant to operational prediction (i.e., the UK Hydrologic Outlook). The authors demonstrate how forecasted sea level pressure anomalies from GloSea6 can be used to select HWAs as inputs to the GR6J hydrology model, leading to improved streamflow prediction over traditional ESP methods in regions more influenced by meteorology than initial hydrologic conditions. While the core methodological progress is incremental, the study provides a rigorous benchmarking of the HWA approach against both climatological and ESP baselines, with results showing meaningful wintertime skill improvements.

>> We thank the reviewer for their detailed comments on our manuscript. We are glad the reviewer recognises the importance of our results as a rigorous benchmarking study for the HWA approach against both climatology and ESP approaches for the UK. Please find below our response in red.

## Major Comments

1. The use of retrospective model simulations (here, termed “simulated observations”) in verification rather than actual streamflow observations is unconventional, and not immediately clear. At the very least, this needs to be better described in the methods section, but it should also be disclosed elsewhere. Additionally, I would request that you strongly consider renaming this variable to a more transparent term, e.g. “retrospective simulation”, retro-sim), so that it is clear that this is not an observational dataset. Please justify this choice (e.g., incomplete obs. dataset, upstream regulations, etc.) and include a discussion of its limitations in the Discussion section.

>> Studies have adopted different terms for simulated river flows over a baseline observational period, such as “proxy observations” or “retrospective simulation” as the reviewer noted. It is common to assess forecast skill using “simulated observed” river flows rather than a direct comparison against observed river flows (e.g. Pappenberger et al., 2015; Wood et al., 2016; Harrigan et al., 2018). The use of “simulated observed” or “retrospective simulated” river flows to assess forecast skill has the advantage of isolating the forecast skill from hydrological model biases. Our use of “retrospective simulation” also enables comparison with previous hindcast skill assessment of the standard ESP in the UK from Harrigan et al., (2018), which have also used “simulated observed” flows as a comparator to calculate skill scores.

We recognize the potential for misunderstanding and will adopt the reviewer's suggestion to change our terminology to "retrospective simulation" and make sure to mention our use of this as a baseline, rather than actual streamflow observations, throughout the revised manuscript and the discussion section.

2. I encourage the authors to consider greater use of the active voice throughout the Methods section. At times, it was unclear who was performing certain actions, which made it difficult to follow some of your methods. For example, when discussing the hindcasts from the GloSea6 prediction system, it was not always clear whether the subject was the UK Met Office or the authors themselves (e.g., "In addition, retrospective forecasts ('hindcasts') for each meteorological season over the 1993-2016 period are produced, initialised from a subset of dates (1st, 9th and 17th) each month." ... and, "Hindcasts were made for each conventional season (DJF - winter, MAM - spring, JJA - summer and SON - autumn)"). Clearer attribution using active voice will make it easier to follow/understand the methodology.

>> Thank you for this suggestion. We will adopt a clearer active voice for the suggested sentences in the methods section.

3. Consider including brief introductory paragraphs at the start of the Results and Discussion sections. Such introductions can outline the key questions addressed, clarify the structure of each section, and provide context for the analyses that follow. It also provides gentler transitions for the reader.

>> Thank you for this suggestion. We will add brief introductory paragraphs to the start of the Results and Discussion sections.

4. Please revise the description of the ESP (and HWA) methods to consistently use standard forecasting terminology such as "meteorological traces," "ensemble members," "hindcast initialization," and "lead time" For example, clarify that ESP ensemble members are generated by running the hydrological model with observed meteorological input sequences (traces) from different years in the historical record, conditioned on the current initial hydrologic state.

>> Thank you for this suggestion. We agree that standard forecasting terminology should be used throughout. We will adopt the terminology suggested by the reviewer throughout the revised manuscript.

It would also be helpful if the authors explicitly describe the GloSea6 climate hindcast initializations (1st, 9th, 17th) to the hydrological forecast initializations (e.g., does each hydrologic forecast correspond to a climate ensemble member initialized on those dates, or are hydrological forecasts always initialized at the start of the season?)

>> Hydrological hindcasts were always initialised from the start of each season. We will clarify that in the revised manuscript.

## Minor Comments

### Introduction

Line 39 - “potential risk during flood-prone seasons”

>> Thanks, will change in revised manuscript

Lines 43-47 - This sentence feels incomplete. Please be more explicit about the implications of the dependencies of IHC and seasonal weather predictability on seasonal hydrologic forecasting. Explicitly stating these implications will help set the stage for the rest of the paper.

Line 53 - consider adding commas after each e.g. (e.g., Hulme and Barrow, 1997), here and elsewhere in the manuscript. Also, it may be the case that the e.g. is overused in your citations in Section 1.1

Line 60 - Instead of just the eastern US, this may be more broadly defined as from eastern North America to Scandinavia

Line 64 - consider condense the West et al. (2019) citation to the end of line 66 only, to remove redundancy.

>> Thanks, we will make all the above changes in revised manuscript

Line 68 - Please define SNAO more explicitly

>> We will make clear to define SNAO as summer NAO.

Line 74 - Broaden topic sentence to hydrologic response variability of all catchments across the UK, then hone in to talk about regional difference, e.g., between the SE and NW

>> Thanks, will add the influence of SNAO on different regions of the UK.

Line 88 - Existing approaches for forecasting what precisely? Weather? Streamflow?

>> We will specify streamflow forecasts.

Line 89 - While the term “analogy” is used, the more common terminology in the literature is “analogue” or “analog” forecasts.

Line 95 - Consider citing the foundational LSTM paper on rainfall-runoff modeling (Kratzert et al 2019)

Line 102 - Please consider citing Day (1985), which documents the original US National Weather Service ESP methodology.

Line 104/105 - break this into two sentences, 1) describing the role of IHCs in providing skill for ESP forecasts (perhaps with more emphasis on this point), and 2) the dominant processes influencing IHCs across the UK

>> Thanks, we will make all the above changes in revised manuscript

Line 129 - Rather than implying that detailed hydrologic modeling is not possible with current NWP output, emphasize the importance of downscaling methods when using NWP as hydrologic model forcing due to discrepancies in spatial resolution

>> Thanks, we will detail the challenges of detailed hydrological modelling using existing generation of NWP outputs.

Section 1.2: This section could benefit from a revised organization. I suggest the following structure:

#1: Simple statistical methods

#2: ESP-based methods

#3: Stylised scenario approaches

#4: NWP-forced hydrologic modelling

>> Thanks, following similar suggestions from reviewer#1, we will more clearly distinguish “deterministic forecasts” with “ensemble-based approaches”, with sub-strands distinguishing statistical methods, ESP-based methods, stylised scenario approaches and NWP-forced modelling.

Additionally, consider the placement of the discussions of LSTMs in this scheme. LSTMs are not traditional statistical methods (as currently categorized, though they are data-driven) and are maybe better thought of as a model type that could be applied within any of the other forecasting approaches. Maybe it would be more appropriate to have a brief discussion of different types of hydrologic models (conceptual, process/physics-oriented, and data-driven including both simple statistical and deep learning methods) all of which can be applied with any of these forecasting methods

>> Thank you for raising this point. We agree that LSTMs should not be considered a separate strand within traditional statistical methods. We will add a brief discussion of the typology of hydrological models and make clear that any one of the hydrological model types could be applied with these forecasting methods.

Line 131 - “climate information into ESP forecasts, often referred to as conditional ESP”. Or similar.

>> This will be made clear in the revised structure of Section 1.2

Line 132 - “sub-sampling meteorological traces” (good to define met trace first)

>> Thank you for the suggested text. These will be changed in accordance with standard forecasting terminologies as suggested by the reviewer.

Line 134 - Please discuss the mechanism of improvements found in W&L (2006) and Beckers et al. (2016)

Line 138 - Small typo: “studies have shown”

Line 139 - Define horizon of “long lead times”

Line 155 - missing em dash after (in-prep)

>> Thanks, we will make all the above changes in revised manuscript

Section 1.3: The transition from conditioned ESP approaches to the HWA method is logical but could be made clearer. Consider adding a sentence or two to explicitly link the evolution of methods, e.g.:

*“While conditioned ESP methods rely on sub-sampling or weighting historical traces based on large-scale climate signals, the HWA approach further advances this concept by identifying specific historical weather patterns that closely match forecasted atmospheric circulation states. This enables forecasts to more directly leverage reliable dynamical model outputs and can provide higher spatial resolution than traditional ESP-based methods.”*

>> Thanks for the suggested text, we will change this according to the reviewer’s suggestion in the revised manuscript.

## Methods

Line 168 - I would not capitalize Chalk and Limestone

Line 169/170 - Exactly how many catchments of your study catchments are part of the UK Benchmark Network?

>> Out of the 314 selected catchments, 128 are from the UK Benchmark Network. We will include that in the revised manuscript.

Section 2.1 - Consider breaking this section into two paragraphs, and being more explicit about what was used as a model input vs. simply a descriptive variables/catchment attribute. The current paragraph reads like a dense list of data sources – more context would be helpful.

Line 200 - this should be two sentences.

Line 205 - Citation on the mKGE?

Line 207 - This i.e. seems out of place. Consider removing.

>> Thanks, we will make all the above changes in revised manuscript

Line 207 - GR6J model results from whom/where? Be more explicit please.

>> This relates to the next sentence and Figure 1 showing the GR6J model results across the selected catchments.

Line 229 - This paragraph (and others in this section, perhaps) could benefit from a clearer problem statement as a topic sentence

>> We will add this.

Line 230 - What do you define as high spatial resolution? Or at least, what is the average catchment size? This might help us better understand discrepancies between seasonal climate model outputs and needed hydrology model inputs.

>> We propose to add a table of average catchment size to the supplementary materials. We consider the use of 1km meteorological observations here as high spatial resolution.

Line 238 - not just simulated monthly patterns, but *predicted* monthly patterns from the hindcasts. It is important to make this clear to help the reader with understanding the key method.

>> Thanks – this will be added to make our methodology clear.

Line 245 - Similarly, this paragraph would benefit from first defining the problem statement, e.g., that the signal to noise of NAO in seasonal climate systems is too small during the winter, and then discussing how you address this challenge.

>> We will add an introductory sentence to this paragraph defining the signal to noise problem as suggested

Section 2.4.1 - Is this a daily timestepped model? Line 274 suggests so, but please state.

>> We will make clear we have used a daily hydrological model.

Line 272 - It would be helpful to use more conventional terms to describe your ESP approach, as you did in Section 1.2. For example, you could write: “For each month in the hindcast period, three-month lead time seasonal ESP hindcasts were generated using the GR6J model forced with meteorological traces from the historical observation record.” This would make your methods more transparent and easier to follow for readers familiar with ESP-based forecasting.

>> This will be changed following the reviewer’s encouragement to adopt standard forecast terminology.

Section 2.4.2 - Consider breaking into two paragraphs for improved readability

Section 2.5 - Consider breaking into two or more paragraphs for improved readability

>> Both suggestions will be made.

## Results

Line 229 - At the beginning of a section, it may be helpful to be specific about what types of forecasts (and at what lead times) you are talking about, e.g. “seasonal streamflow forecasts”, not weather forecasts (for example)

Line 330 - Have you defined this positive skill threshold of 0.05 yet?

Line 346 - NI? Not defined.

Line 350 - Use proper name and then define abbreviation

>> We will make all the above changes in revised manuscript

Figure 3 - Consider including key details to allow figures to stand alone more effectively, e.g., that this is across 314 UK study catchments. Same for hindcast period years. Also, add a CRPSS label to the colorbars, and a key for the arrow direction.

>> We will add that to the figure legend. The colors and arrow direction are already included in the figure caption.

Figure 4 - Add colorbar labels. In the caption, consider revising to: “Blue colours indicate the HWA method is better than the ESP benchmark reference, red colours...” Additionally, please clarify whether the symbol direction (triangle up/down) represents the same information as the color (i.e., skill difference). If not, consider using the symbol to convey complementary information – such as the sign of the HWA skill score relative to climatology. For example, an upward triangle could indicate HWA is skillful compared to climatology, while a downward triangle could indicate it is not. This would allow readers to quickly assess not only where HWA outperforms ESP, but also where it is meaningfully skillful in an absolute sense.

Figure 5 - Add a descriptive label on colorbar

Figure 6 - Please consider updating the y-axis label to “DJF Mean Daily Flow” or a similar more descriptive term. Additionally, consider adding a shaded region indicating the 25th–75th percentile range around the ESP and HWA ensemble means. This would provide a sense of ensemble dispersion and improve the interpretability of the forecast spread. Please also update “Obs Sim” to “Retro Sim”.

>> All of the above will be changed to improve figure clarity as the reviewer suggested.

Figure 7 - Is the colorbar incorrectly labeled (e.g. AUC instead of ROC)?

>> Yes, this was mislabelled – we will correct.

Line 425 - Develop this logic just a bit further – why are you highlighting winter flow predictability over other seasons?

>> We have chosen to highlight winter river flow predictability as it is the season where the highest number of catchments saw improved flow predictability against the standard ESP method. We also highlight the winter season as rainfall over the UK is strongly positively correlated with the leading mode of climate variability (i.e. winter NAO). In other seasons, total rainfall variability is less well explained by the leading modes of climate variability (e.g. summer NAO in JJA). The influence of global climate patterns on UK weather in the other seasons also tends to be smaller than in the winter. Hence, we would expect a forecasting system conditioned on predictability of



weather patterns to have a higher increase in skill in the winter compared to other seasons.

Figure 9 - The probability bar plots are hard to see and even harder to compare against the observed outlook categories. That said, I do think the case studies are really valuable, so I think it's worth considering how to improve this figure. What about colored pie charts? Or aggregation of results to regions? I would also define the NAO phase in the "Winter 1994/95" and "Winter 2009/10" subtitles.

>> We would prefer to retain this figure as is. This is the standard format for visualising forecast results from the UK Hydrological Outlook. The visualisation approach and the colours have been adopted after extensive stakeholder consultation and is operationalised via both the monthly Hydrological Outlook and in the interactive online Outlook portal. We will define the NAO phase in the revised manuscript.

Figure 10 - Please clarify the scientific value of including jet speed as an intermediate variable in this figure. Does examining jet speed, in addition to NAO index, provide insight into the added value of HWA versus ESP?

>> We have included jet speed as it is a more direct description of atmospheric circulation compared to the NAO. As the HWA approach do not sample for analogues using the NAO index, but instead selects analogues based on the spatial MSLP pattern, a more process-based variable like jet stream indicators, adds more physical insights to the HWA approach. Jet speed is a well-known driver of UK rainfall and is highly correlated with winter rainfall, particularly over western Scotland (with a stronger correlation than winter NAO).

Additionally, is there a statistically significant difference in HWA-ESP skill between different NAO phases? Might you be able to explain differences in skill between the two methods using total catchment storage (e.g., Harrigan et al. (2018), line 503)?

>> As stated in our results section, we think there is not enough years within the hindcast ensemble (1993-2016) to robustly determine whether there are statistically significant difference in HWA-ESP skill between different winter NAO phases. It has been shown robustly by Harrigan et al., (2018) that ESP skill is associated with total catchment storage. The HWA approach, as a conditioned ESP approach, would naturally retain skill in areas with high catchment storage (e.g. as shown by year-round skill in summer flow predictability for catchments in the south-east), but also leverage the improved predictability of atmospheric circulation patterns to improve skill in catchments where river flow variability is strongly tied with rainfall variability (e.g. those with limited catchment storage). We will strengthen this argument in the revised discussion section.

## Discussion



Line 502 - Please clarify that these conclusions about the role of IHCs are specific to the UK context, as the cited studies (Svensson, 2016; Svensson et al., 2015) are focused on UK catchments. Otherwise, broaden citations.

>> We will specify these conclusions are for the UK context.

Line 510 - What was the study domain of the Baker et al. (2018) study?

>> This was a global study investigating the physical drivers contributing to the predictability of the winter NAO in various forecasting systems (including GloSea).

Section 4.2 - The current text details the comparative skill of HWA and ESP methods, but could be strengthened by more explicitly discussing the implications of the role of IHCs in ESP forecasts. Please elaborate on what your findings suggest about when and where IHCs are most critical for skill, how this influences forecast design and operational use, and what this means for improving seasonal prediction in regions dominated by IHC versus meteorological predictability.

>> Thank you for the suggestion. We will discuss clearly when and where IHCs contribute the most to forecast skill and when/where improved meteorological predictability contributes to forecast skill. This is also in accordance with similar suggestions from reviewer #1 with more discussion on forecast design, such as multi-method forecast blending based on forecast skill assessed over a hindcast period (e.g. choosing the best forecasting method for different seasons).

## Conclusion

Line 629 - Suggested addition: "... in South East England, where initial hydrologic conditions related to groundwater storage provide seasonal predictability".

>> We will add this.

## References:

Harrigan, S., Prudhomme, C., Parry, S., Smith, K. and Tanguy, M., 2018. Benchmarking ensemble streamflow prediction skill in the UK. *Hydrology and Earth System Sciences*, 22(3), pp.2023-2039.

Pappenberger, F., Ramos, M.H., Cloke, H.L., Wetterhall, F., Alfieri, L., Bogner, K., Mueller, A. and Salamon, P., 2015. How do I know if my forecasts are better? Using benchmarks in hydrological ensemble prediction. *Journal of Hydrology*, 522, pp.697-713.

Svensson, C., 2016. Seasonal river flow forecasts for the United Kingdom using persistence and historical analogues. *Hydrological Sciences Journal*, 61(1), pp.19-35.

Stringer, N., Knight, J. and Thornton, H., 2020. Improving meteorological seasonal forecasts for hydrological modelling in European winter. *Journal of Applied Meteorology and Climatology*, 59(2), pp.317-332.

Wood, A.W., Hopson, T., Newman, A., Brekke, L., Arnold, J. and Clark, M., 2016. Quantifying streamflow forecast skill elasticity to initial condition and climate prediction skill. *Journal of Hydrometeorology*, 17(2), pp.651-668.
